# Supplementary material for: Epigenetic regulation of thyroid hormone-induced adult intestinal stem cell development during anuran metamorphosis
Source: PubMed Central journal article supplement (PMC4417507; doi:10.1186/2045-3701-4-73), 2014-11-28
Supplement: 13578_2014_210_MOESM1_ESM.pdf [file 13578_2014_210_MOESM1_ESM.pdf]

# Embryogenesis

# Premetamorphosis

# Metamorphosis

# End of metamorphosis

TR: little

high

high

low

T3: little

little

low to high

low

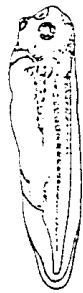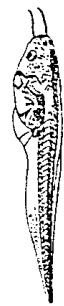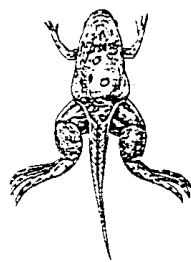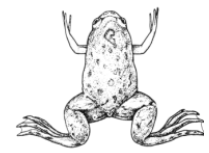

Intestine

Stage

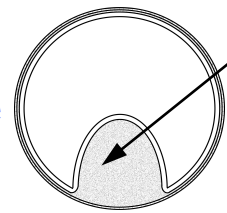

51

Typhlosole

Apoptotic cells

Proliferating cells  
(Progenitor/Stem cells)

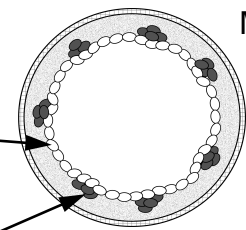

61

Muscles

Connective tissue

Epithelial folds

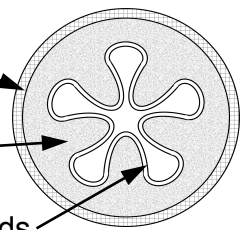

66
