# Supplementary material for: Epigenetic regulation of thyroid hormone-induced adult intestinal stem cell development during anuran metamorphosis
Source: PubMed Central journal article supplement (PMC4417507; doi:10.1186/2045-3701-4-73), 2014-11-28

**Day 2**

**Ct**

**TSA**

**T3**

**T3/TSA**

**Day 3**

**Ct**

**TSA**

**T3**

**T3/TSA**

**TR $\beta$**

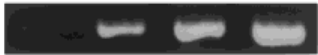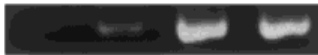

**IFABP**

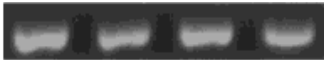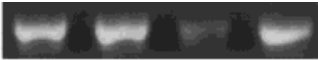

Supplement: 13578_2014_210_MOESM3_ESM.pdf [file 13578_2014_210_MOESM3_ESM.pdf]
